# Supplementary material for: Berberine Chloride is an Alphavirus Inhibitor That Targets Nucleocapsid Assembly
Source: PubMed Central journal article supplement (PMC7327175; doi:10.1128/mbio.01382-20), 2020-06-30

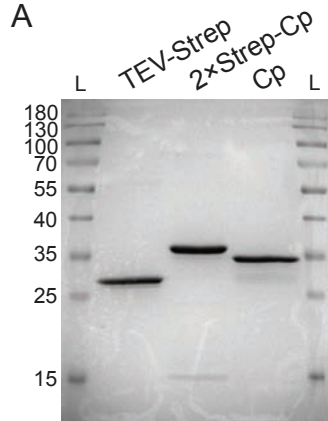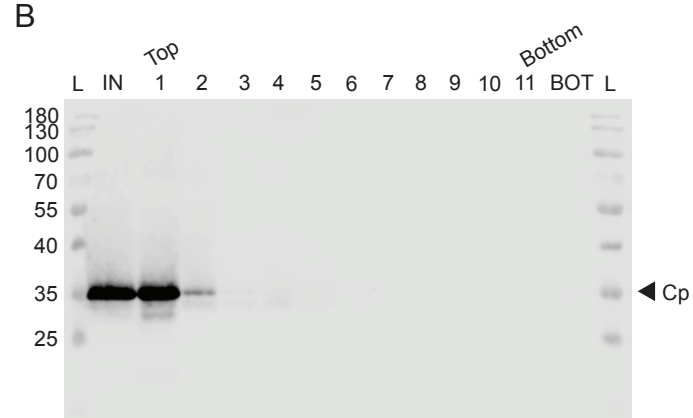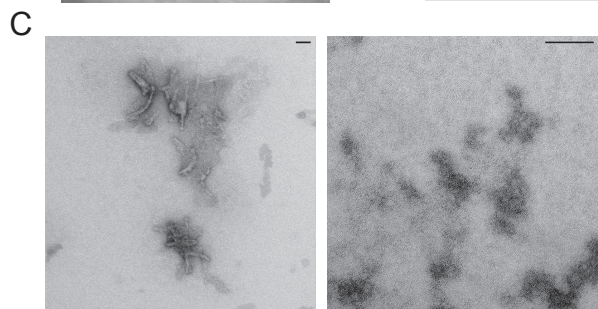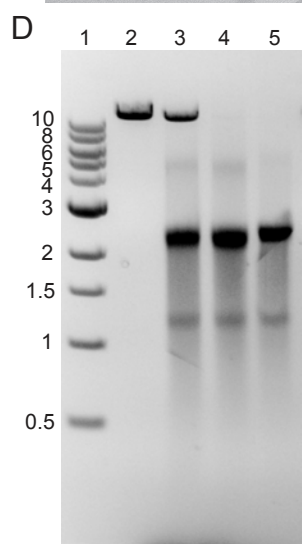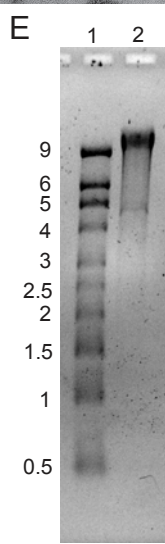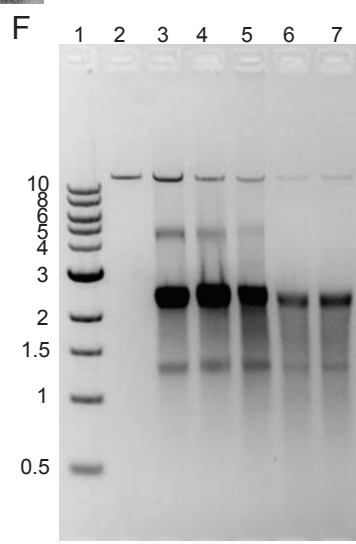

Supplement: mBio.01382-20-sf005.pdf [file mBio.01382-20-sf005.pdf]
