# Supplementary material for: Berberine Chloride is an Alphavirus Inhibitor That Targets Nucleocapsid Assembly
Source: PubMed Central journal article supplement (PMC7327175; doi:10.1128/mbio.01382-20), 2020-06-30

**A**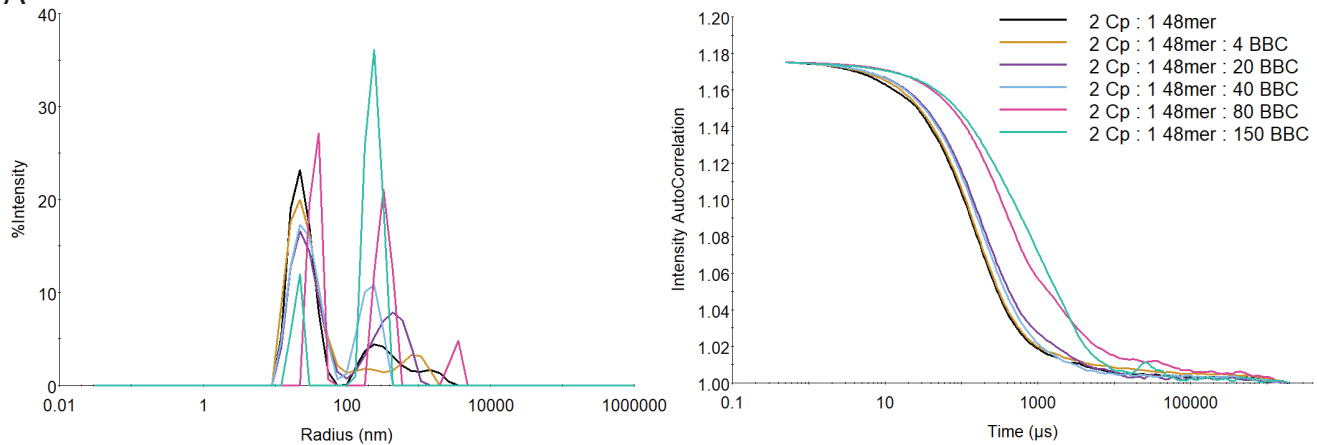**B**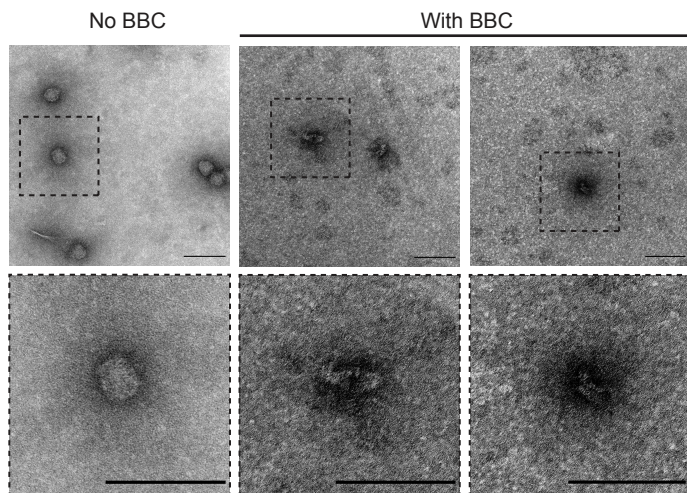

Supplement: mBio.01382-20-sf008.pdf [file mBio.01382-20-sf008.pdf]
